# Supplementary material
Source: PubMed Central journal article supplement (PMC3349901)

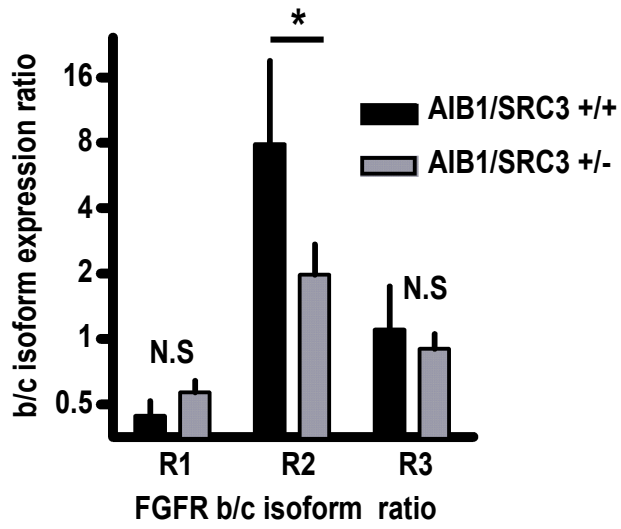

Fig. S10

Al-Otaiby M, et al

Supplement: mmc10.pdf [file mmc10.pdf]

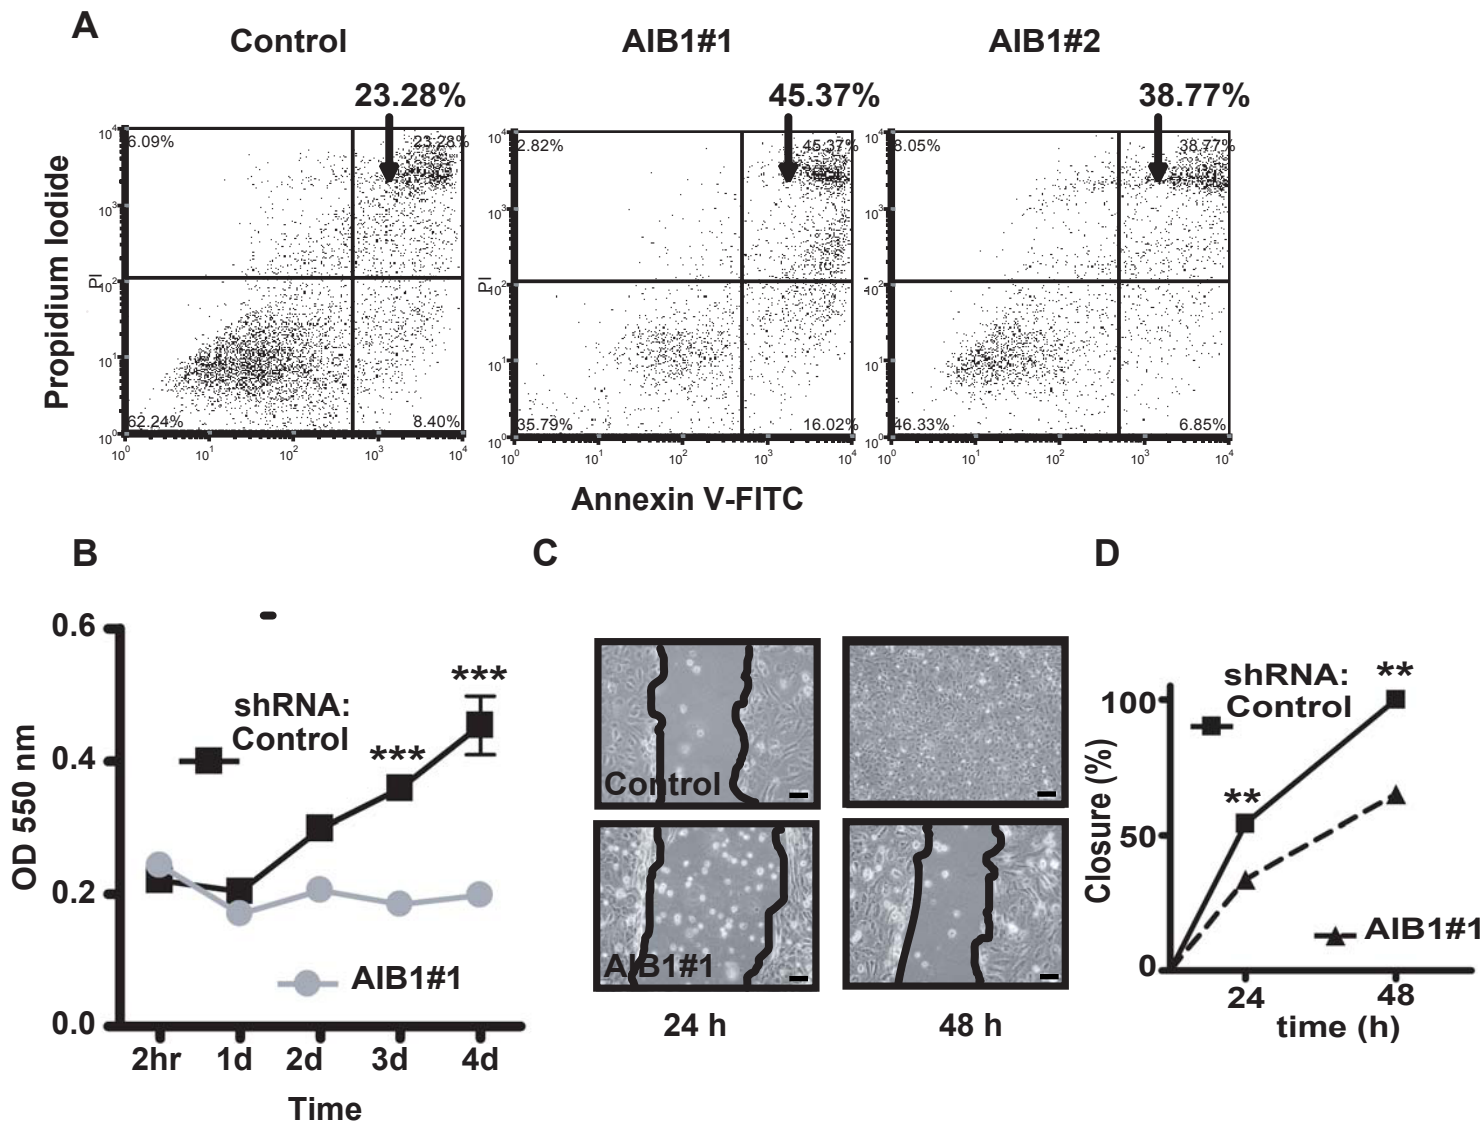

Fig. S2

Supplement: mmc2.pdf [file mmc2.pdf]

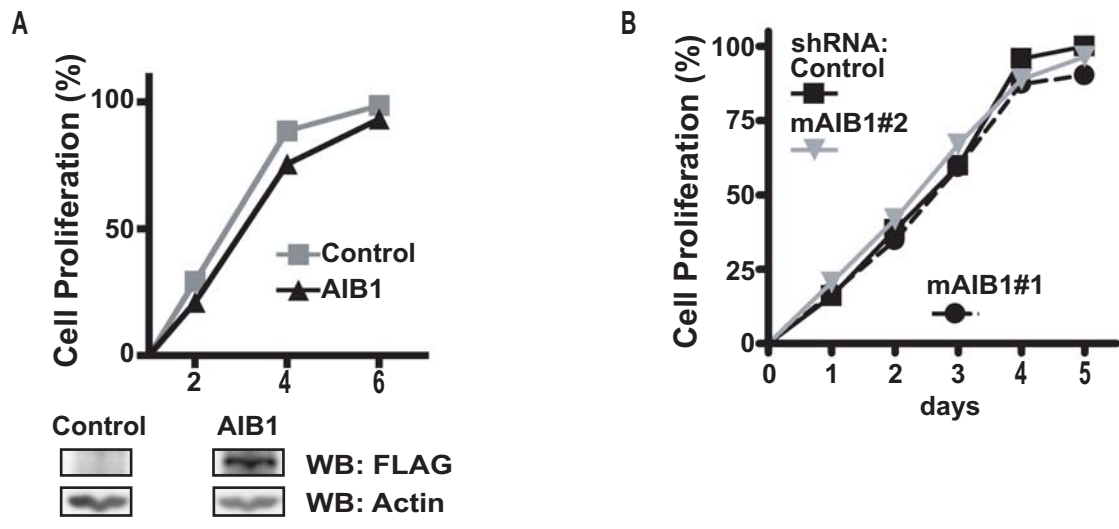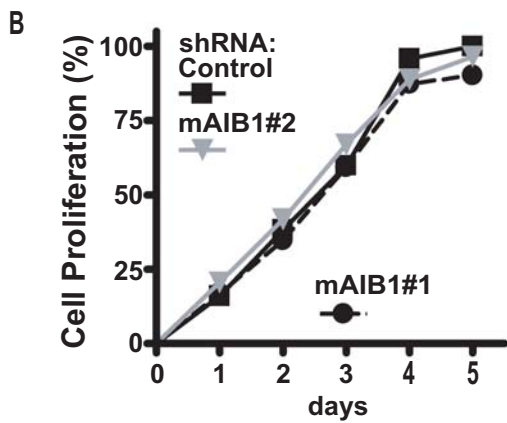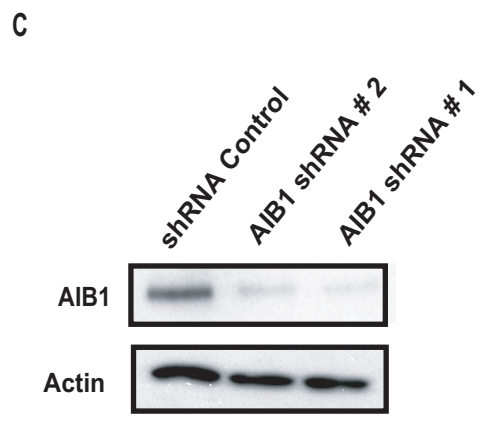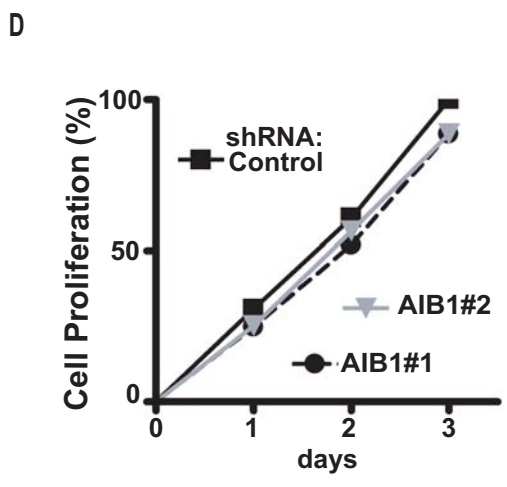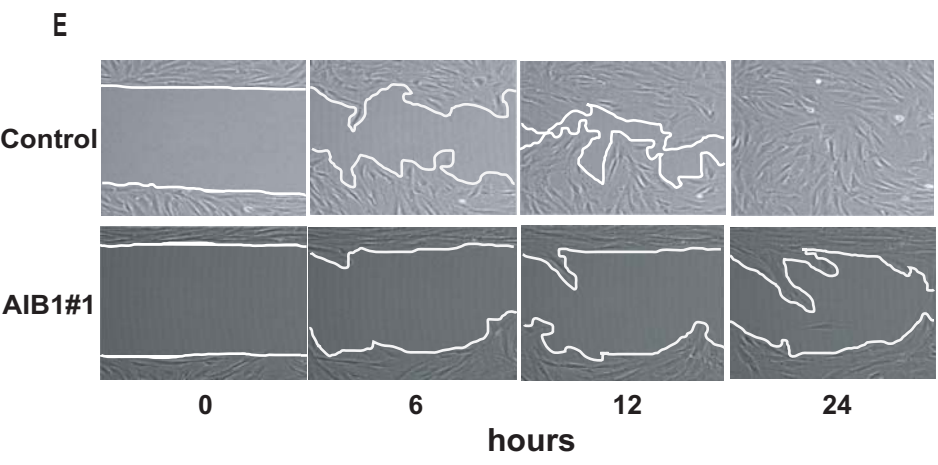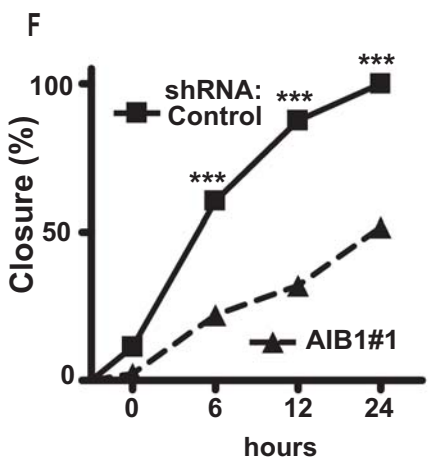

Fig. S3

Al-Otaiby M, et al.

Supplement: mmc3.pdf [file mmc3.pdf]

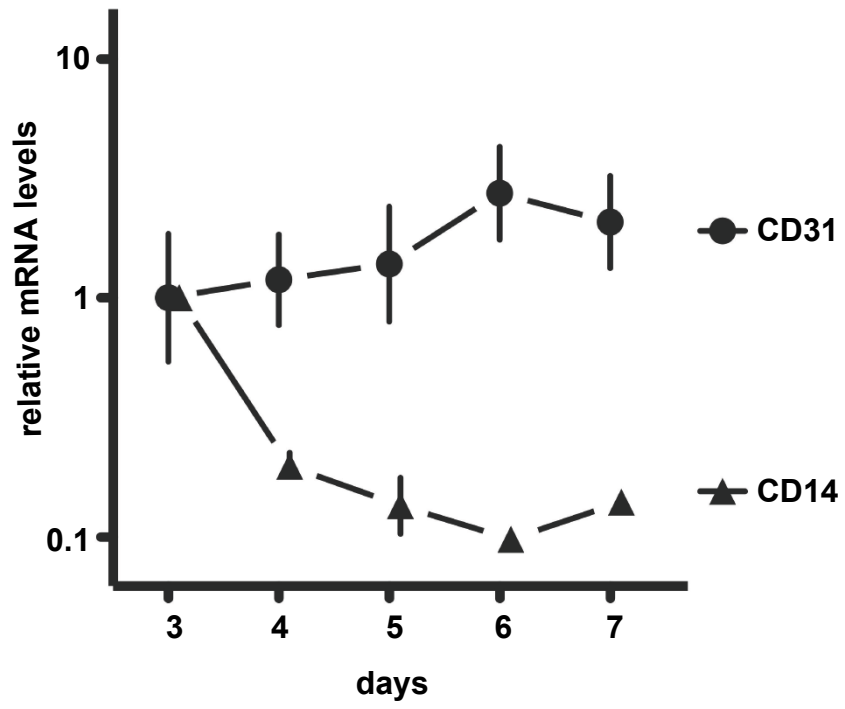

Fig. S4

Al-Otaiby M, et al.

Supplement: mmc4.pdf [file mmc4.pdf]

A. Recipients: AIB1/SRC3 +/+

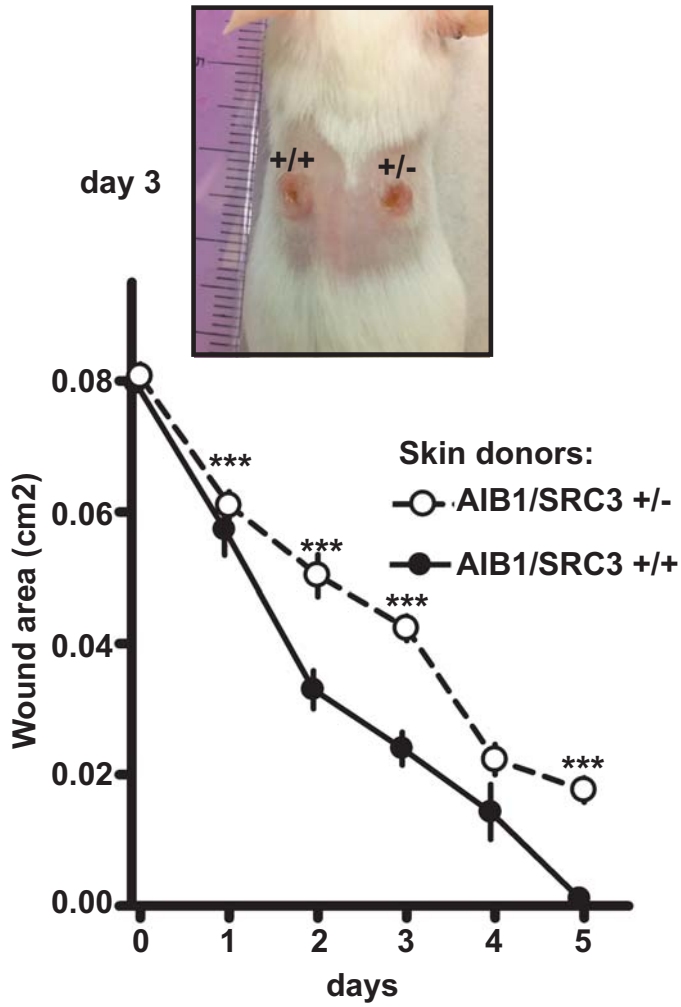

B. Recipients: AIB1/SRC3 +/-

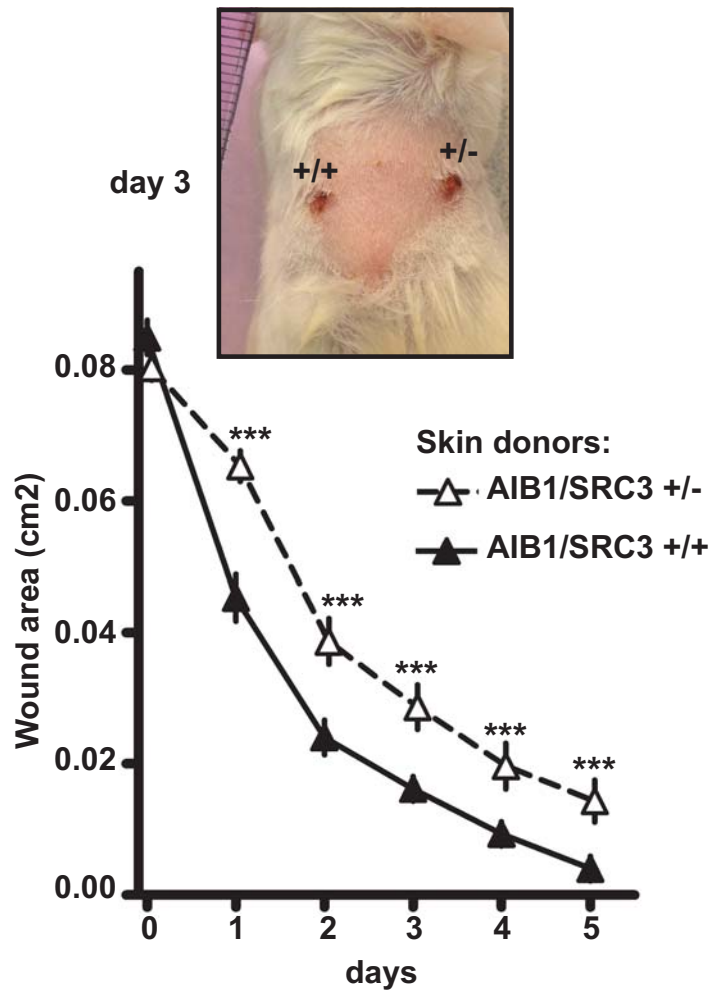

Fig. S6

Supplement: mmc6.pdf [file mmc6.pdf]

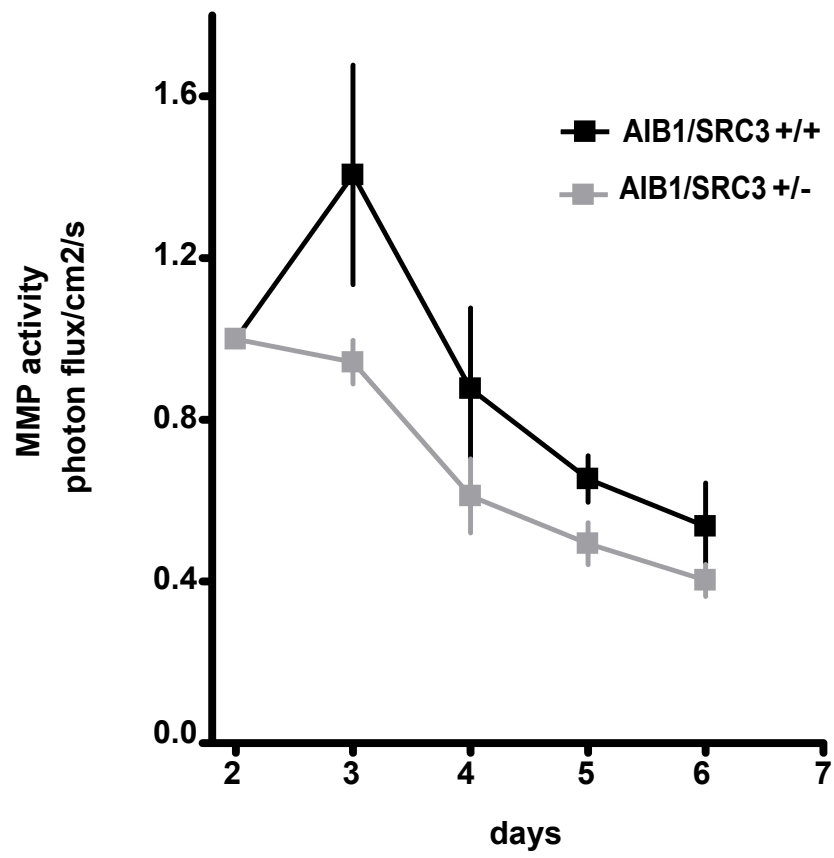

Fig. S8

Al-Otaiby M, et al

Supplement: mmc8.pdf [file mmc8.pdf]
